# Supplementary material
Source: PubMed Central journal article supplement (PMC3248304)

## Supplemental Figure Legends

### **Figure S1: Hypothalamic inflammation occurs within 3d of HFD consumption in C57Bl6 mice.**

Quantification of pro-inflammatory cytokine IL-1 $\beta$  and NF- $\kappa$ B pathway (I $\kappa$ B $\alpha$ , IKK $\beta$ ) gene expression in the hypothalamus of C57Bl6 wild-type mice fed Chow or HFD for up to 7d (n=6/group). All mRNA species are quantified relative to GAPDH housekeeping gene expression (by DD CT method) and presented as fold-change relative to Chow-fed controls. \*p<0.05 vs Chow; #p = 0.072

### **Figure S2: HFD does not alter microglial number in brain regions outside the arcuate nucleus in rat.**

Quantification of microglial cell number in several regions of rat brain derived from the Iba-1 immunostained frozen sections utilized for the analysis in Figure 3. LHA= Lateral hypothalamic area; VMH = ventromedial hypothalamus.

### **Figure S3: HFD causes microglial accumulation in the mediobasal hypothalamus of C57Bl6 mice.**

Visualization of microglia by immunodetection of Iba1 protein in 10mm-thick frozen sections of mouse brain (n=8/group) taken from 10wk-old animals fed either A) Chow or B) HFD for 1wk, C) 2wk, or D) 3wk; or E) fed Chow for 8mo or F) HFD for 8mo.

Figure S1: Hypothalamic inflammation occurs within 3d of HFD consumption in C57Bl6 mice.

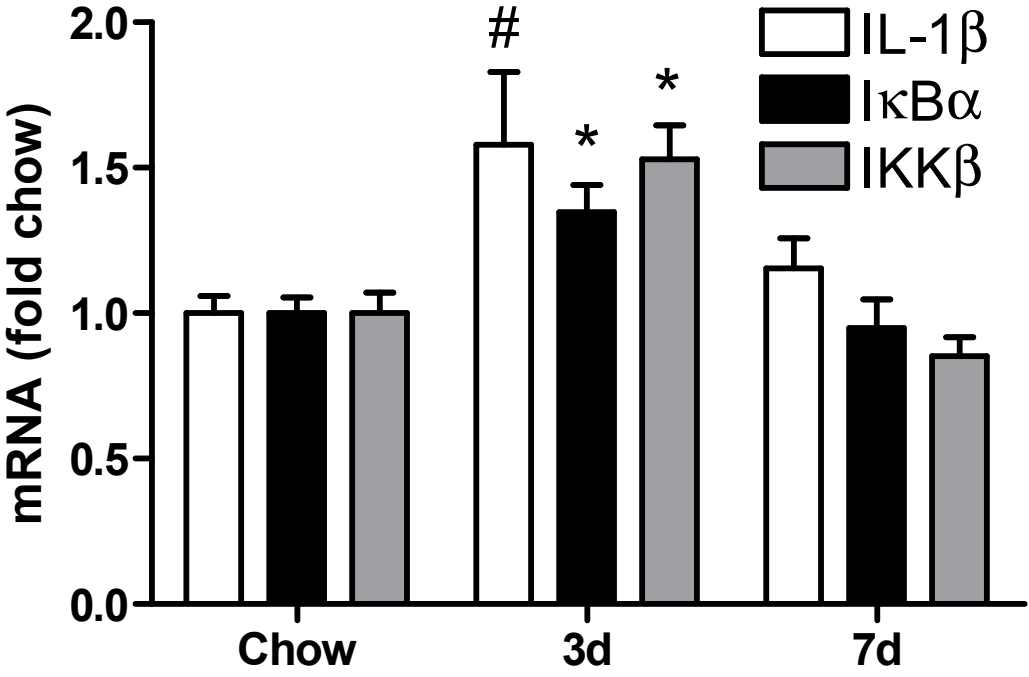

Figure S2: HFD does not alter microglial number in brain regions outside the arcuate nucleus in rat.

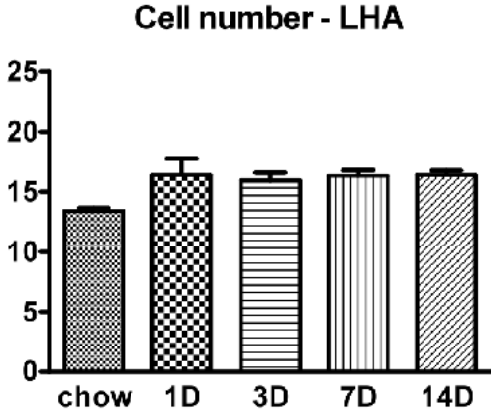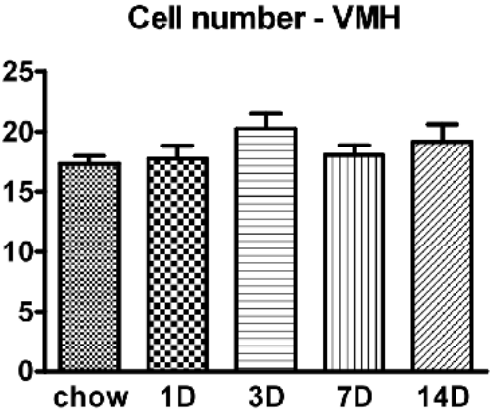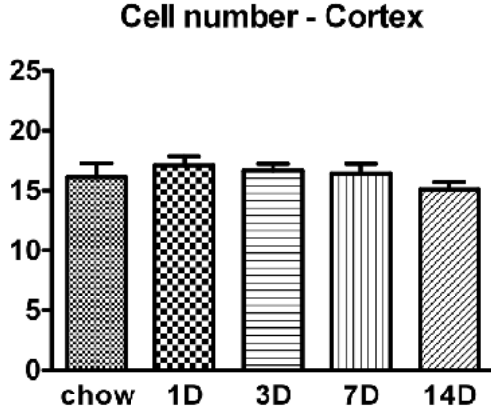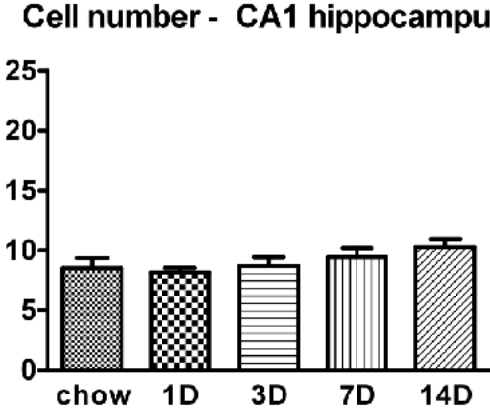

**Figure S3: HFD causes microglial accumulation in the mediobasal hypothalamus of C57Bl6 mice.**

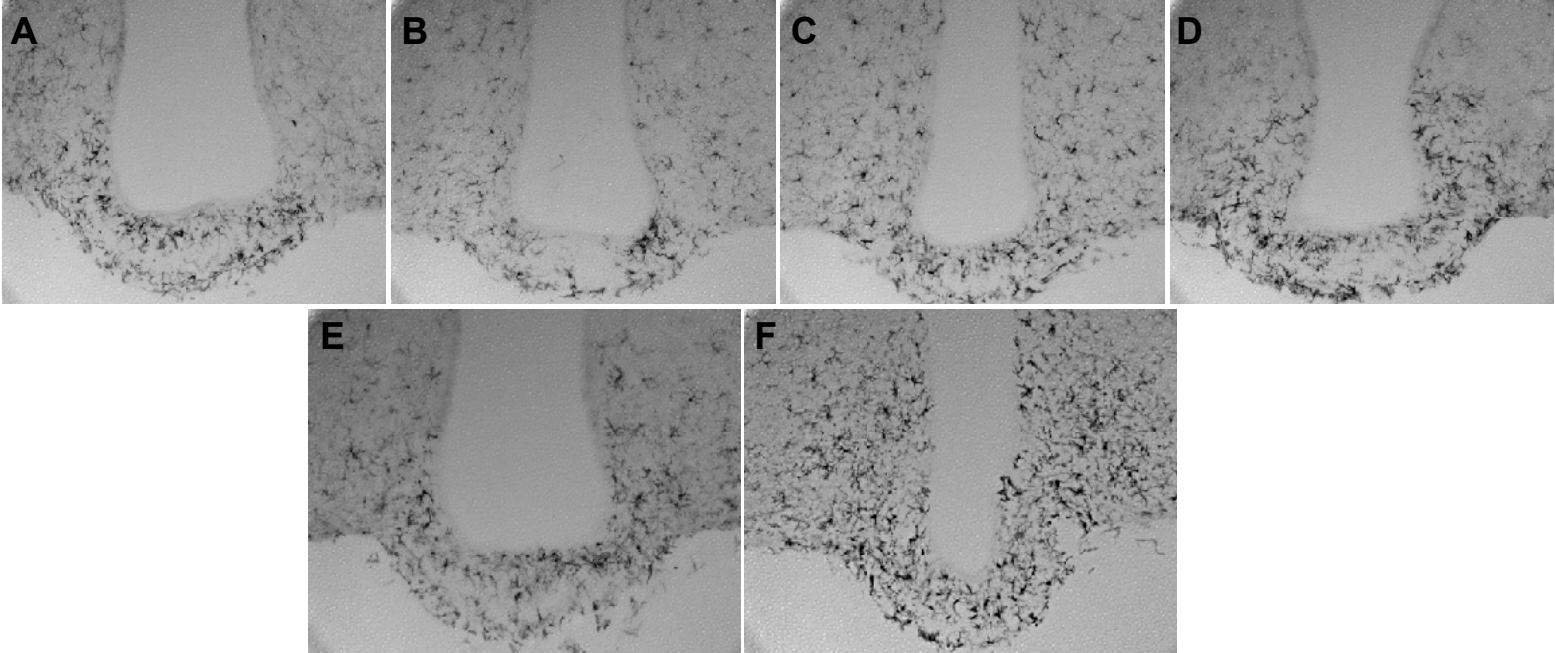

Supplement: JCI59660sd.pdf [file JCI59660sd.pdf]
